# Supplementary material
Source: PubMed Central journal article supplement (PMC7484188)
Supplement: JB.00280-20-s0001.pdf [file JB.00280-20-s0001.pdf]

Table S1. Strains and plasmids

| Strain or Plasmid                                 | Genotype and relevant characteristics                                                                              | Source or Reference |
|---------------------------------------------------|--------------------------------------------------------------------------------------------------------------------|---------------------|
| <u>Strains</u>                                    |                                                                                                                    |                     |
| <i>Pseudomonas aeruginosa</i> PAO1                |                                                                                                                    | (1)                 |
| <i>P. aeruginosa</i> PAO1 $\Delta hpf$            | <i>P. aeruginosa</i> with markerless <i>hpf</i> deletion                                                           | (2)                 |
| <i>P. aeruginosa</i> PAO1 $\Delta rmf$            | <i>P. aeruginosa</i> with markerless <i>rmf</i> deletion                                                           | (2)                 |
| <i>P. aeruginosa</i> PAO1 $\Delta hpf/\Delta rmf$ | <i>P. aeruginosa</i> with markerless <i>hpf</i> and <i>rmf</i> deletions                                           | (2)                 |
| <u>Plasmids</u>                                   |                                                                                                                    |                     |
| pMF54                                             | P <sub>trc</sub> expression vector pKK233-2 with oriV <sub>SF</sub> <i>oriT lacI<sup>q</sup></i> ; Ap <sup>r</sup> | (3)                 |
| pES43                                             | pMF54 with wild-type <i>hpf</i> PCR product in <i>NcoI-HinDIII</i> site                                            | This study          |
| pES44                                             | pMF54 with <i>hpf</i> R83A                                                                                         | This study          |
| pES45                                             | pMF54 with <i>hpf</i> K87A                                                                                         | This study          |
| pES49                                             | pMF54 with <i>hpf</i> R29A                                                                                         | This study          |
| pES50                                             | pMF54 with <i>hpf</i> R26A                                                                                         | This study          |
| pES53                                             | pMF54 with <i>hpf</i> Y71S                                                                                         | This study          |
| pES54                                             | pMF54 with <i>hpf</i> Y71F                                                                                         | This study          |
| pES55                                             | pMF54 with <i>hpf</i> L27R                                                                                         | This study          |
| pES56                                             | pMF54 with <i>hpf</i> L81A                                                                                         | This study          |
| pES57                                             | pMF54 with <i>hpf</i> L85A                                                                                         | This study          |
| pES58                                             | pMF54 with <i>hpf</i> K23A                                                                                         | This study          |
| pES59                                             | pMF54 with <i>hpf</i> L24A                                                                                         | This study          |
| pES60                                             | pMF54 with <i>hpf</i> L27A                                                                                         | This study          |
| pES61                                             | pMF54 with <i>hpf</i> M70K                                                                                         | This study          |
| pES62                                             | pMF54 with <i>hpf</i> K80A                                                                                         | This study          |
| pES69                                             | pMF54 with <i>hpf</i> H8A mutation                                                                                 | This study          |
| pES70                                             | pMF54 with <i>hpf</i> L10A                                                                                         | This study          |
| pES71                                             | pMF54 with <i>hpf</i> I56A                                                                                         | This study          |
| pES72                                             | pMF54 with <i>hpf</i> I74A                                                                                         | This study          |
| pMF496                                            | pMF54 with <i>hpf</i> Y71F/R83S                                                                                    | This study          |
| pMF497                                            | pMF54 with <i>hpf</i> Y71F/K23A                                                                                    | This study          |
| pMF498                                            | pMF54 with <i>hpf</i> Y71F/R29A                                                                                    | This study          |
| pMF499                                            | pMF54 with <i>hpf</i> Y71F/K80A                                                                                    | This study          |
| pMF501                                            | pMF54 with <i>hpf</i> Y71F/R26A                                                                                    | This study          |
| pMF503                                            | pMF54 with <i>hpf</i> Y71F/R26A/K80A                                                                               | This study          |
| pMF504                                            | pMF54 with <i>hpf</i> Y71F/R26A/R83A                                                                               | This study          |
| pMF505                                            | pMF54 with <i>hpf</i> Y71F/R29A/K80A                                                                               | This study          |
| pES74                                             | pMF54 with C-terminal truncated <i>hpf</i> (95 aa)                                                                 | This study          |
| pES77                                             | pMF54 with <i>hpf</i> from <i>Escherichia coli</i>                                                                 | This study          |
| pES78                                             | pMF54 with <i>yfiA</i> from <i>E. coli</i>                                                                         | This study          |
| pES79                                             | pMF54 with long- <i>hpf</i> from <i>Staphylococcus aureus</i> USA300                                               | This study          |
| pES80                                             | pMF54 with long- <i>hpf</i> (CD0142) from <i>C. difficile</i> VPI 10463                                            | This study          |
| pES81                                             | pMF54 with long- <i>hpf</i> (CD2444) from <i>C. difficile</i> VP1 10463                                            | This study          |

**Table S2: Primers Sequences used in this study**

| <b>Name</b>                | <b>Sequence</b>                               |
|----------------------------|-----------------------------------------------|
| 5'_NcoI_hpf_inframe        | TTACCATGGAAGTCAACATCAGTGGC                    |
| HPF_3'_HindIII             | GGTCAAGCTTTGCTCAAGTCGATCATAGGGGA              |
| 5'_NcoI_hpf_inframe_H8A_FW | TTACCATGGAAGTCAACATCAGTGGCGCTCAACTGGAT        |
| 5'_NcoI_hpf_L10A_FW        | TTACCATGGAAGTCAACATCAGTGGCCATCAAGCGGATGTGACC  |
| HPF_K23A_Down_FW           | TATGTCGGCGAGGCACTGAGCCGTCT                    |
| HPF_K23A_Up_REV            | AGACGGCTCAGTGCCTCGCCGACATA                    |
| HPF_L24A_Down_FW           | GTCGGCGAGAAAGCGAGCCGTCTGGA                    |
| HPF_L24A_UP_REV            | TCCAGACGGCTCGCTTTCTCGCCGAC                    |
| HPF_R26A_Down_for          | GGCGAGAACTGAGCGCTCTGGAGCGCCATTTT              |
| HPF_R26A_Up_rev            | GAAATGGCGCTCCAGAGCGCTCAGTTTCTCGCC             |
| HPF_L27A_Down_FW           | AAACTGAGCCGTGCGGAGCGCCATTT                    |
| HPF_L27A_Up_REV            | AAATGGCGCTCGCGACGGCTCAGTTT                    |
| HPF R29A_Down_for          | CTGAGCCGTCTGGAGGCCATTTGACAAGATC               |
| HPF R29A_Up_rev            | GATCTTGTGCAAATGGGCCTCCAGACGGCTCAG             |
| HPF_I56A_Up_REV            | TCGCCACCGGCGGCGCGCAGGGTG                      |
| HPF_I56A_Down_FW           | CACCTGCGCGCCGCCGGTGGCGA                       |
| HPF_M70A_Down_FW           | GAACATGAGGACGCGTACGCGGCCAT                    |
| HPF_M70A_Up_REV            | ATGGCCGCGTACGCGTCTCATGTTC                     |
| HPF Y71S_Up_Rev            | GTCGATGGCCGCGGACATGTCCTCATG                   |
| HPF Y71S_Down_for          | CATGAGGACATGTCCGCGGCCATCGAC                   |
| HPF Y71F_Down_for          | CATGAGGACATGTTGCGCGGCCATCGAC                  |
| HPF Y71F_Up_Rev            | GTCGATGGCCGCGAACATGTCCTCATG                   |
| HPF_I74A_Down_FW           | CATGTACGCGGCCGCCGACCTGCTGATCG                 |
| HPF_I74A_Up_REV            | CGATCAGCAGGTCGGCGGCCGCGTACATG                 |
| HPF_K80A_Down_FW           | CTGCTGATCGACGCACTCGACCGTCA                    |
| HPF_K80A_Up_REV            | TGACGGTTCGAGTTCGCTCGATCAGCAG                  |
| HPF_L81A_Down_FW           | TGCTGATCGACAAAGCCGACCGTCAACTGA                |
| HPF_L81A_Up_REV            | TCAGTTGACGGTCGGCTTTGTCGATCAGCA                |
| HPF R83A_Down_for          | ATCGACAACTCGACGCTCAACTGATCAAACAC              |
| HPF R83A_Up_rev            | GTGTTTTCGATCAGTTGAGCGTCGAGTTTGTGAT            |
| HPF_L85A_Down_FW           | ACTCGACCGTCAAGCGATCAAACACAAAG                 |
| HPF_L85A_Up_REV            | CTTTGTGTTTTCGATCGCTTTCGCGGTCGAGTT             |
| HPF_K87A_Down_for          | GACCGTCAACTGATCGCACACAAAGAGAAGTAT             |
| HPF K87A_Up_rev            | ATACTTCTCTTTGTGTGCGATCAGTTGACGGTC             |
| 3'_hpf_trunc95_HindIII_REV | GATAAGCTTTACCGTTTCGAGATACTTCTCTTTG            |
| 3'_hpf_trunc97_HindIII_REV | GATAAGCTTTTCATTGCTGCCGTTTCGAGATACT            |
| 3'_hpf_trunc99_HindIII_REV | GATAAGCTTTTCATACGCCTTTCGCGCT                  |
| 5'_NcoI_hpf_EC             | TTACCATGGAGCTCAACATTACCGG                     |
| 3'_hpf_EC_HindIII          | GCAAAGCTTCCGCCATGCACATGCTAAT                  |
| 5'_NcoI_yfiA_EC            | TTACCATGGCAATGAACATTACCAGCAA                  |
| 3'_yfiA_EC_HindIII         | ATCAAGCTTCGTTGGCGATACACTCAATA                 |
| 5'_NcoI_CD0142             | TATCCATGGACATAATTATATCTGGAAAACAAA             |
| 3'_CD0142_HindIII          | TCCAAGCTTTATCGATAGCTAATATGATTAAATCTAAATTG     |
| 5'_NcoI_CD2444             | TTTCCATGGAAATAATAGTATCTGGGAGACA               |
| 3'_CD2444_HindIII          | ATCAAGCTTTCTTATATAAAAATCTAAACGTATACAATTTTTATT |
| 5'_NcoI_yfiA_SA            | TTACCATGGTTAGATTTGAAATTCATGGAGATAACC          |
| 3'_yfiA_SA_HindIII         | TGGAAGCTTAAAAAGCACTTGTGCAAAAACA               |

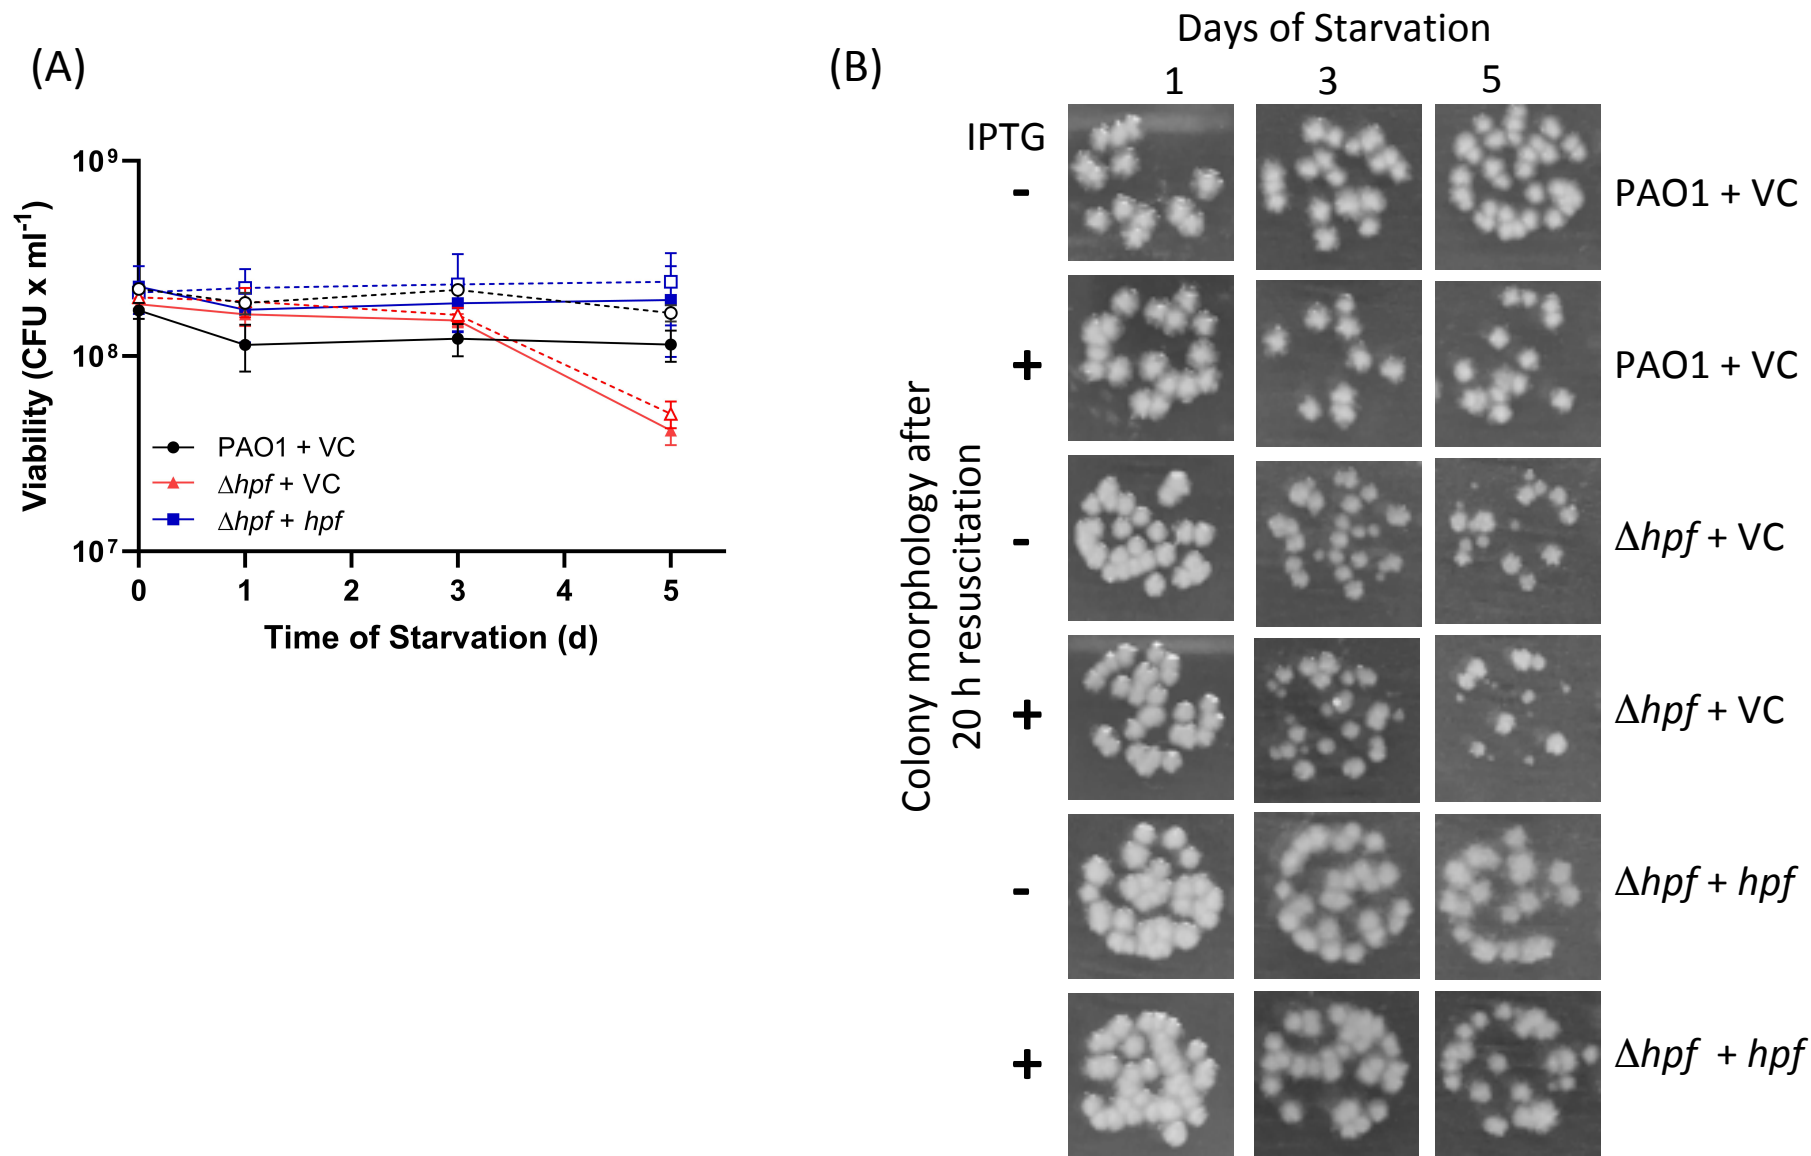

Figure S1. (A) Colony forming units (CFUs) over 5 days of starvation for *P. aeruginosa* PAO1 containing the vector control (VC, pMF54) (circles), *P. aeruginosa*  $\Delta hpf$  + vector control (triangles), and *P. aeruginosa*  $\Delta hpf$  complemented with IPTG inducible *hpf* (squares). Bacteria were cultured to stationary phase (20 h) in TSB with IPTG (solid lines) or without IPTG (dashed lines), washed in PBS, then incubated in PBS at 37C for 5 d. Aliquots were plated and CFUs were used to determine the total number of recoverable cells following starvation. Error bars represent the mean and standard error for three independent biological replicates. (B) Colony morphologies of *P. aeruginosa* PAO1 and the *P. aeruginosa*  $\Delta hpf$  mutant strains over the course of starvation. *P. aeruginosa*  $\Delta hpf$  shows colony heterogeneity, including small colony variants, after starvation. The wild-type strain and the *hpf* complemented strain show homogeneous large colony morphology over the course of starvation. Induction of *hpf* with IPTG did not affect colony morphology.

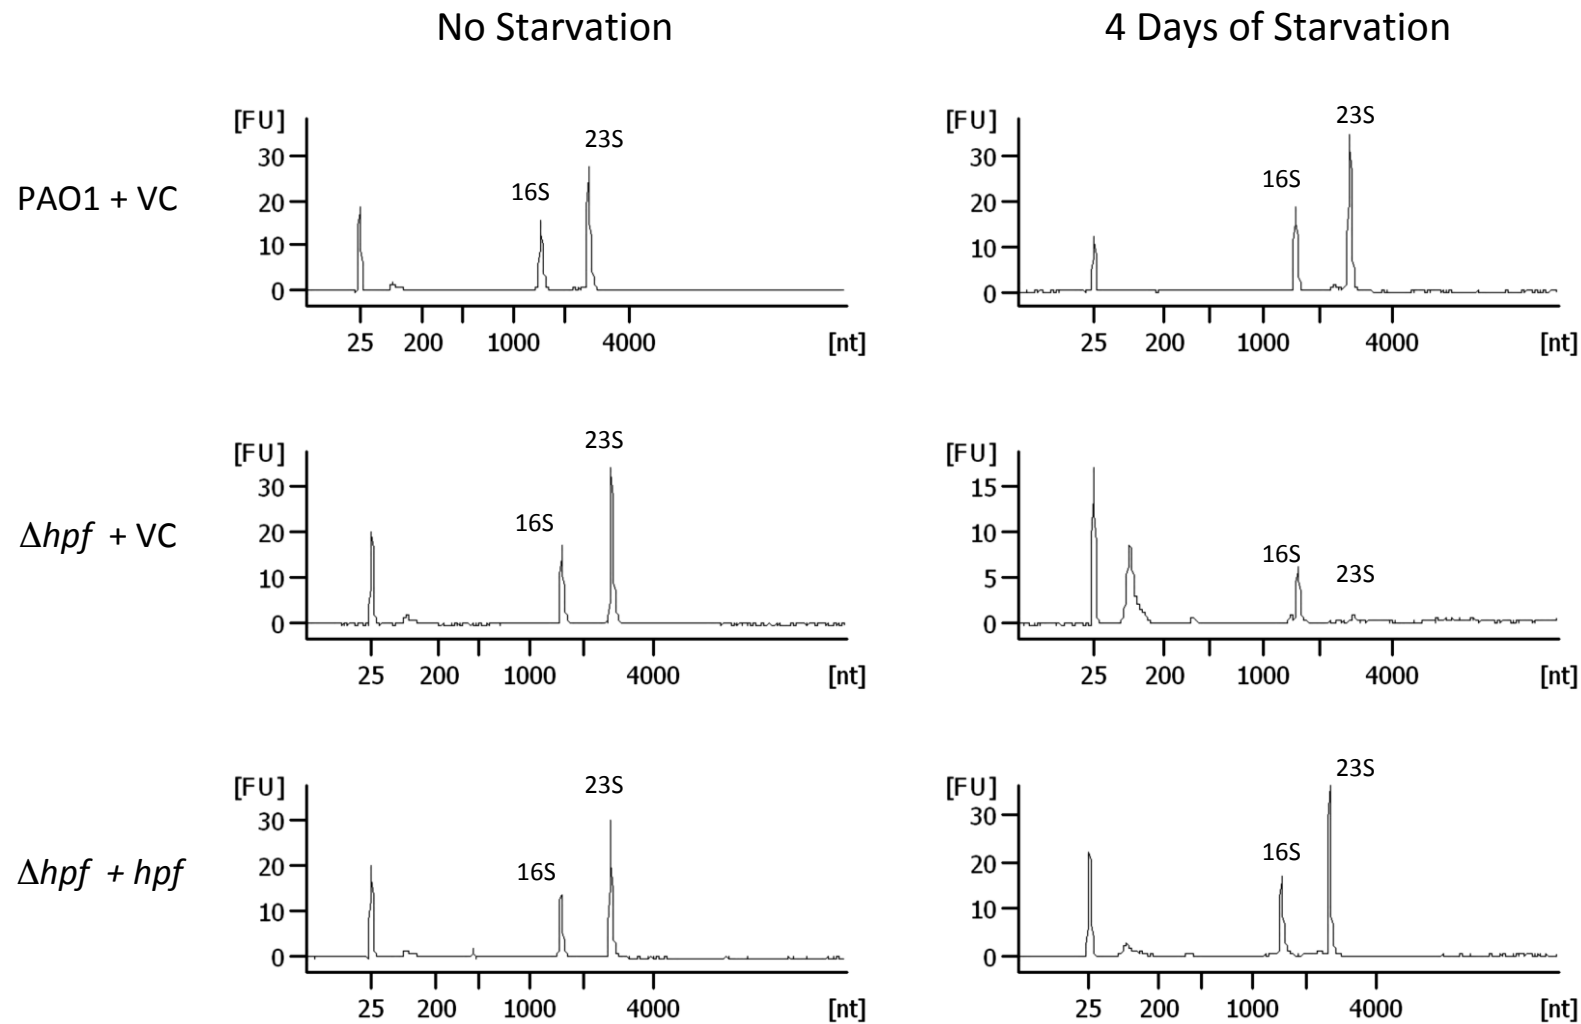

Figure S2. Analysis of 23S and 16S rRNA using the Agilent Bioanalyzer. *P. aeruginosa* PAO1 with the empty vector control showed 23S to 16S rRNA ratios of approximately 1.5 prior to starvation and after 4 days of starvation. *P. aeruginosa*  $\Delta hpf$  + vector control had similar 23S/16S rRNA ratios to the wild-type strain prior to starvation, but the 23S rRNA band was almost completely lost after four days of starvation. The  $\Delta hpf$  strain complemented with wild-type *hpf* expressed *in trans* had 23S/16S rRNA ratios that were similar to the wild-type strain before and after four days of starvation.

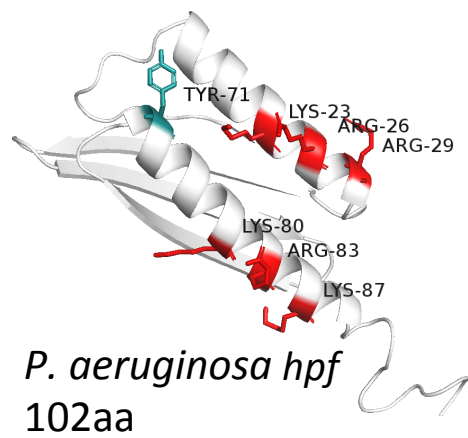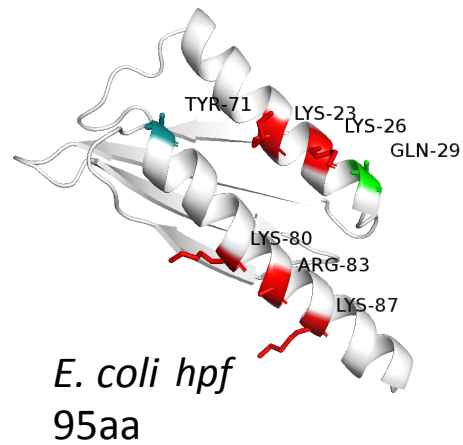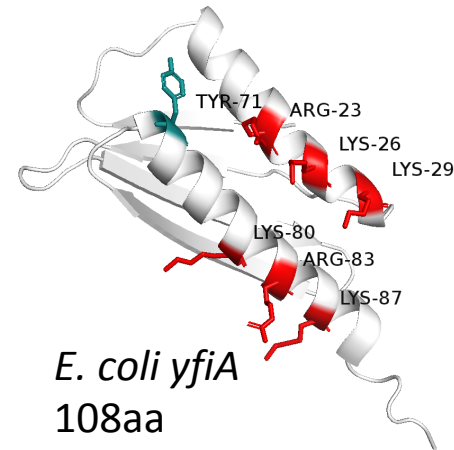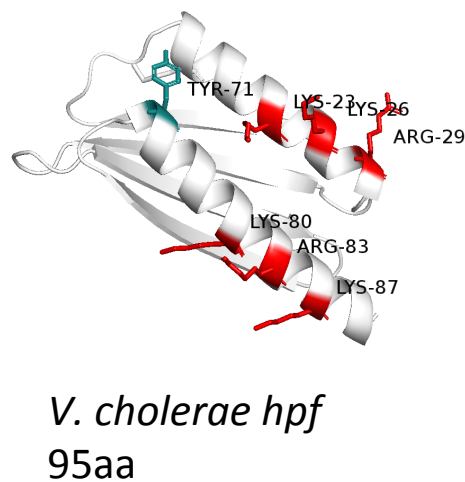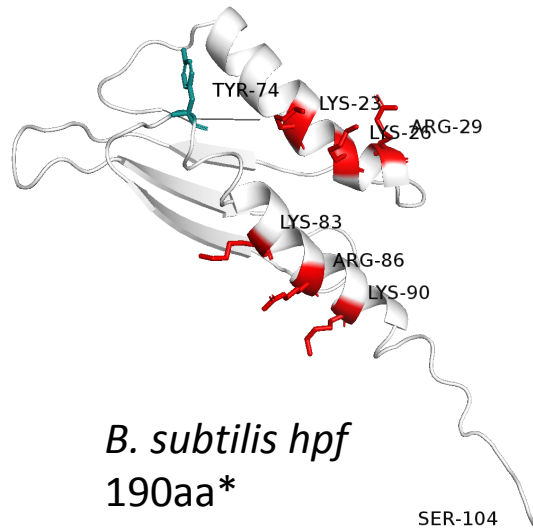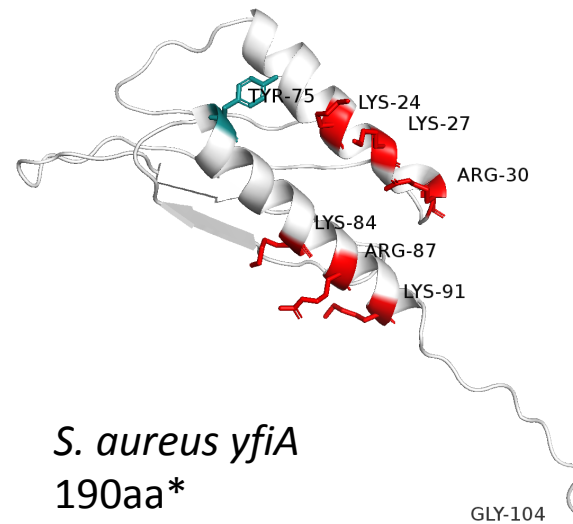

Figure S3: Structures of HPF homologs obtained from the protein database (PDB) and the predicted structure of HPF from *P. aeruginosa* using iTASSER. Highlighted are conserved positively charged amino acids (red) and a conserved tyrosine (Y71) residue. \*PDB files for long-HPFs of *B. subtilis* and *S. aureus* were truncated to highlight the conserved N-terminal domain. PDB files: *E. coli* HPF (4V8H) (4), *E. coli* YfiA (4V8I) (4), *V. cholerae* HPF (4HEI) (5), *B. subtilis* HPF (5NJT) (6), *S. aureus* HPF (5ND9) (7).

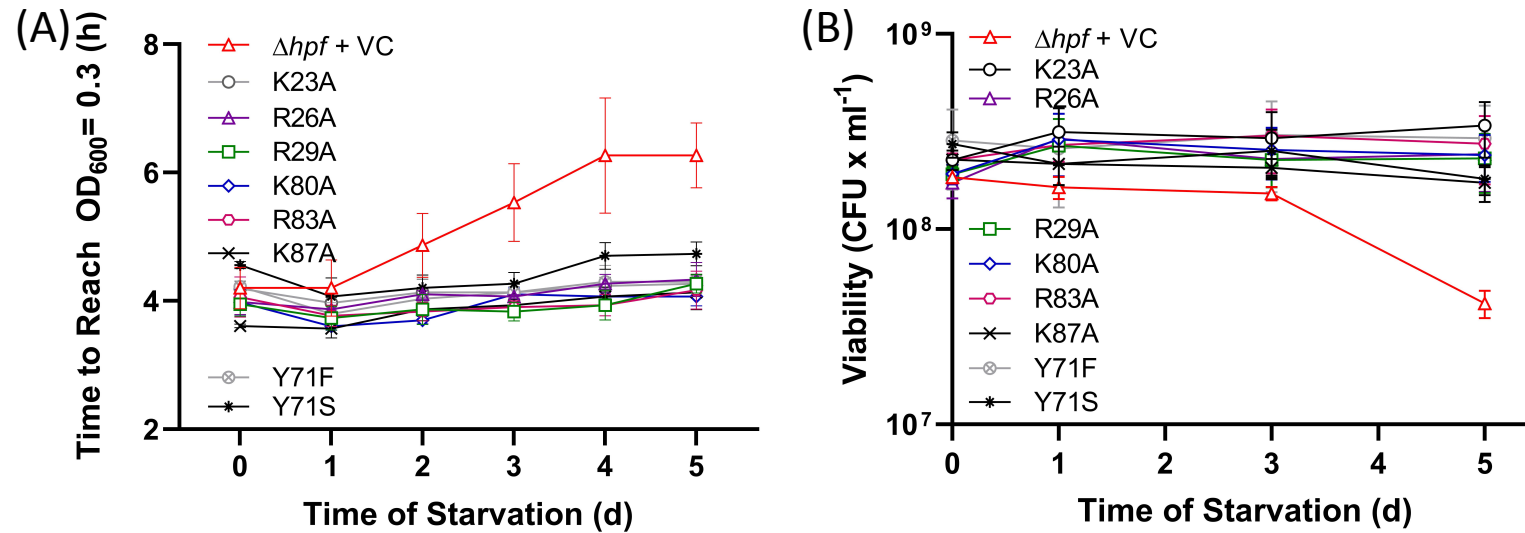

Figure S4. (A) Resuscitation of *P. aeruginosa*  $\Delta hpf$  with mutant forms of HPF measured as time to reach  $O.D._{600} = 0.3$ , for strains pre-cultured with 1 mM IPTG. (B) Resuscitation of *P. aeruginosa*, as indicated by colony forming units (CFUs) following starvation. Strains were precultured in the presence of 1 mM IPTG. Red triangles show impaired resuscitation of the *P. aeruginosa*  $\Delta hpf$  mutant, but restoration of survival during starvation for strains complemented with *hpf* containing point mutations. The symbols are the same as in Fig 3. Data show the mean and standard error of the mean for three biological replicates.

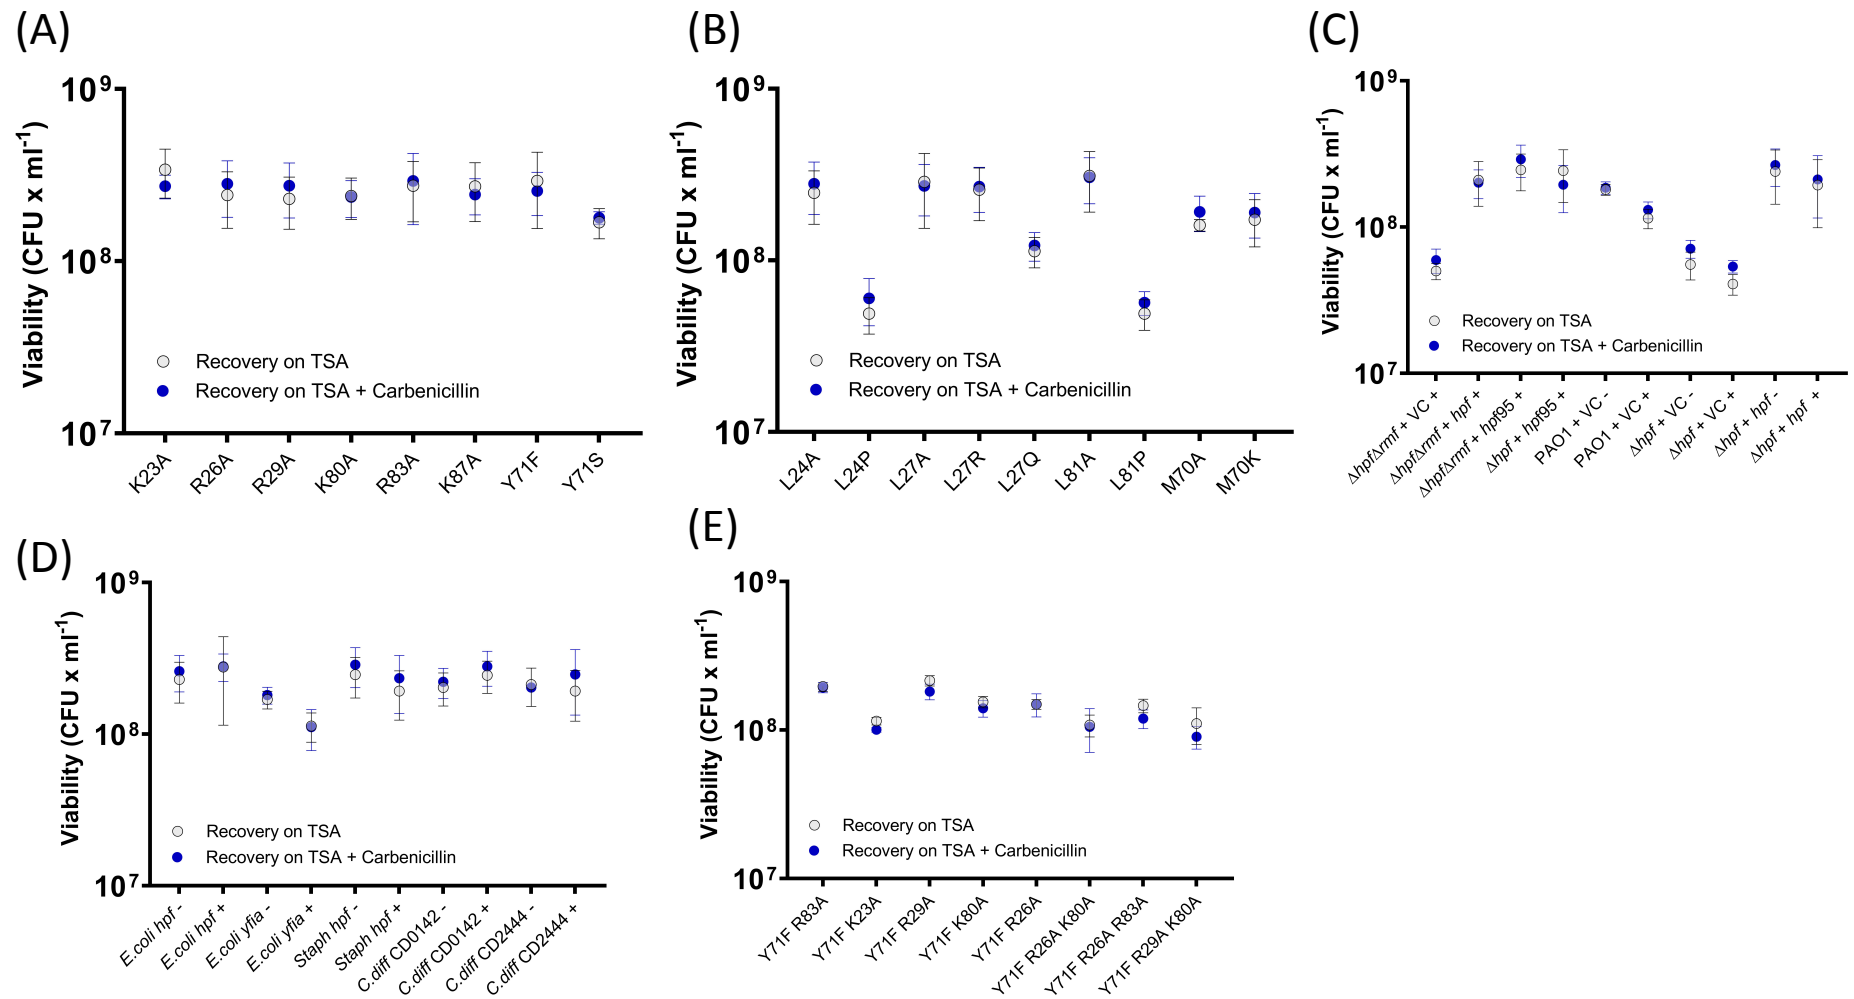

Figure S5: Comparison of CFUs after 5 d of starvation with cells plated on TSB (blue circles) and on TSB with carbenicillin (gray circles). No significant difference was observed in the CFU numbers comparing with and without carbenicillin, indicating that all strains maintained plasmids for 5 d of starvation. Error bars represent the mean and standard error for three independent biological replicates.

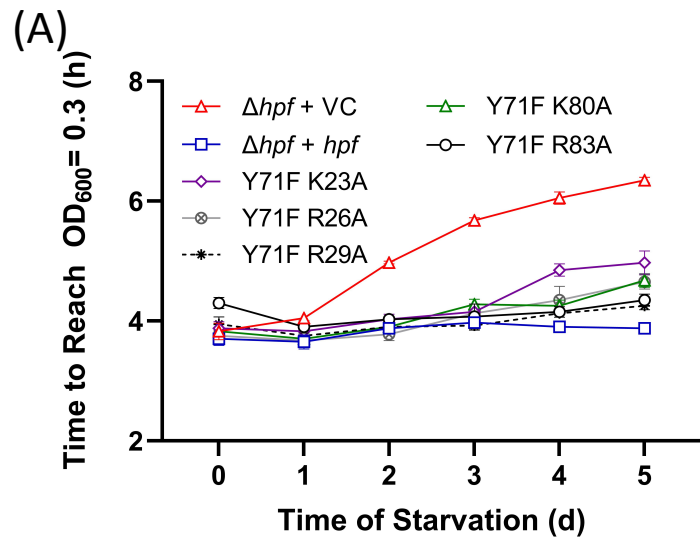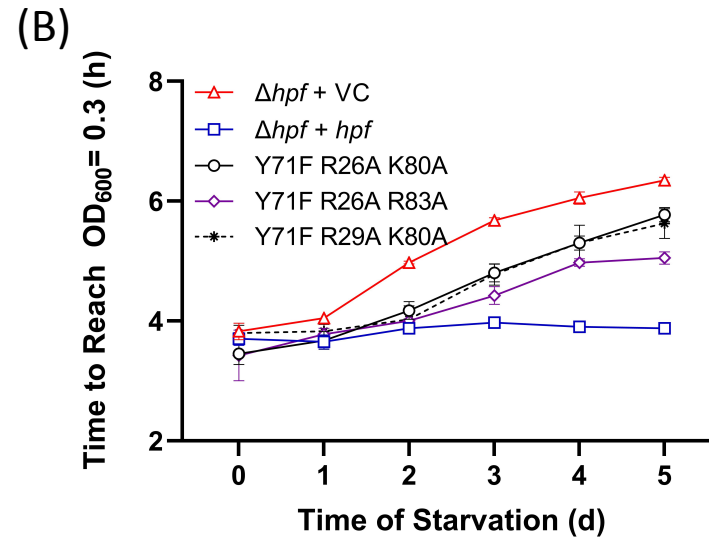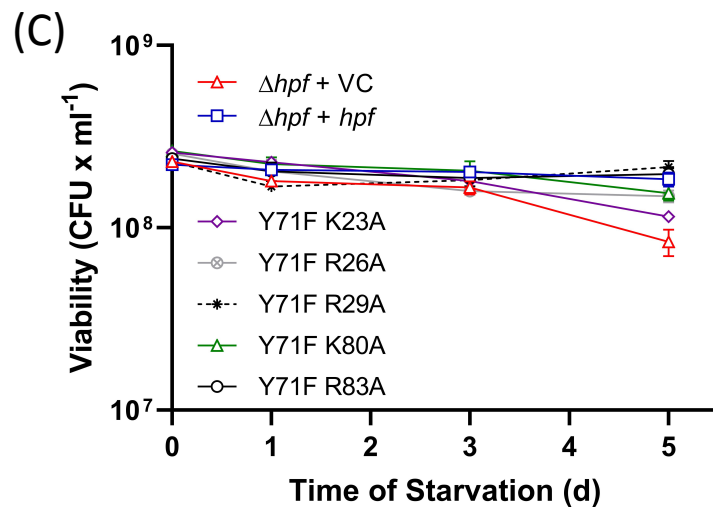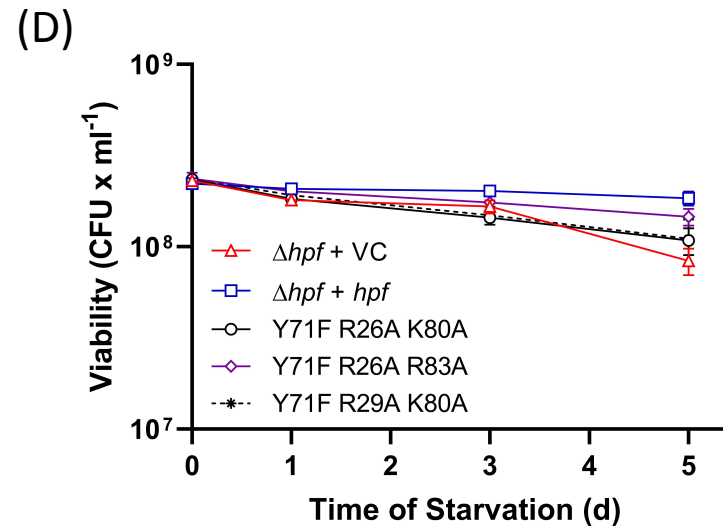

Figure S6 Effect of double and triple point-mutations on regrowth over the course of starvation when the strains were pre-cultured with 1 mM IPTG added to the medium. (A) Time to reach O.D.600 = 0.3 over the course of starvation, for the double point-mutants. (B) Time to reach O.D.600 = 0.3 over the course of starvation, for the triple point-mutants. (C) Effect of double point-mutations in HPF on regrowth of *P. aeruginosa*  $\Delta hpf$  over the course of starvation, measured as CFUs. (D) Effect of triple point-mutations in HPF on regrowth of *P. aeruginosa*  $\Delta hpf$  over the course of starvation, measured as CFUs. All data show the mean and standard error of the mean for three biological replicates.



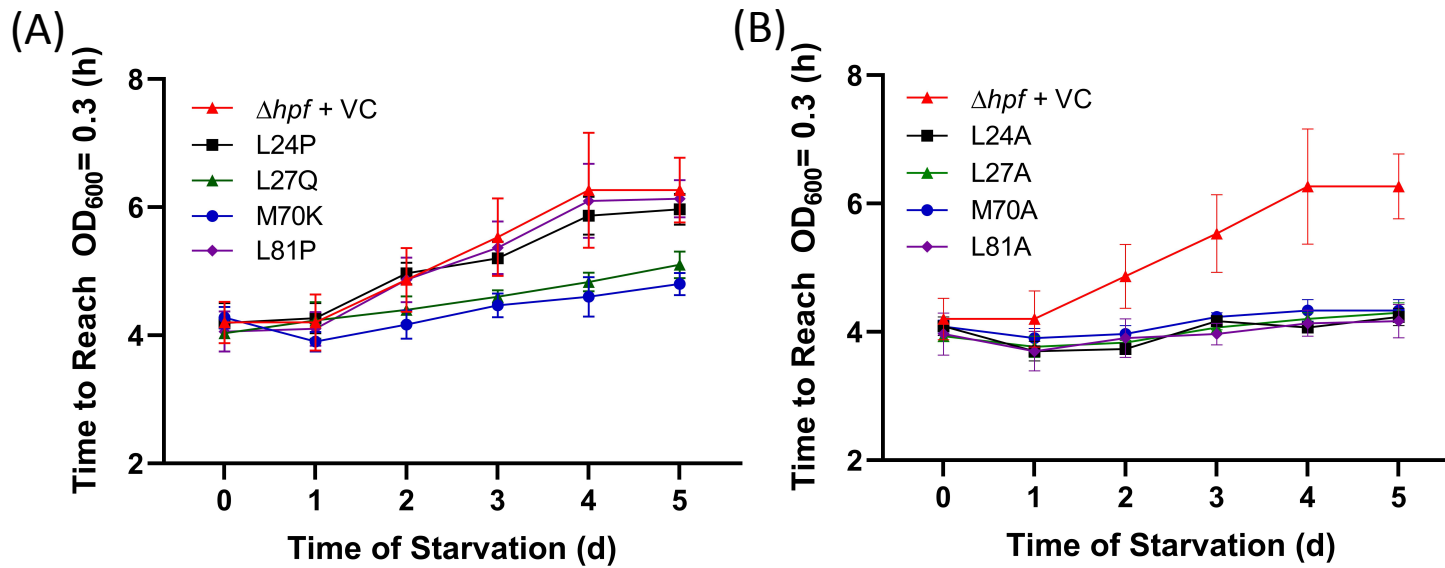

Figure S7. (A) Regrowth following starvation of *P. aeruginosa*  $\Delta hpf$  containing *hpf* with point mutations obtained by error-prone PCR and screening for a resuscitation defect. Strains were pre-cultured in the presence of 1 mM IPTG. Red triangles indicate *P. aeruginosa*  $\Delta hpf$  containing the vector control. (B) Regrowth following starvation of *P. aeruginosa*  $\Delta hpf$  complemented with *hpf* where the mutations shown in panel A were replaced by alanines. Strains were pre-cultured in the presence of 1 mM IPTG. All data show the mean and standard error of the mean for three biological replicates.

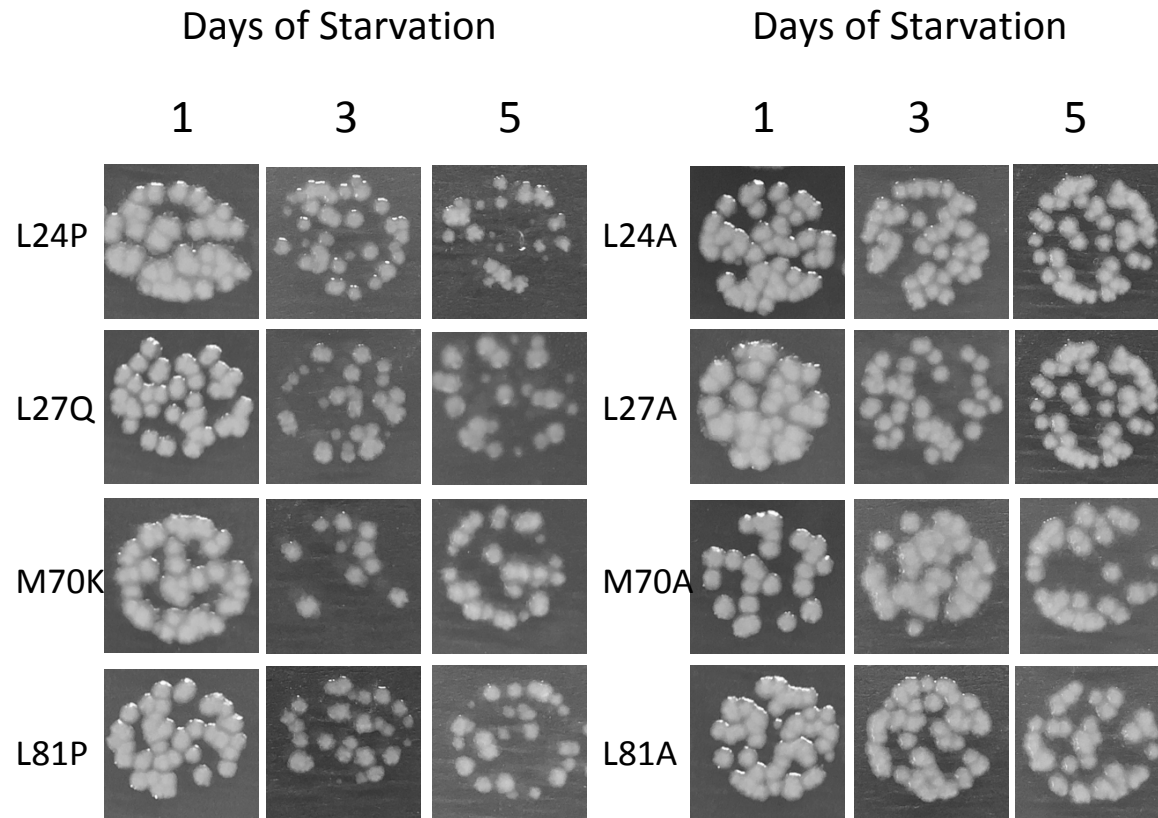

Figure S8. Colony morphologies of *P. aeruginosa*  $\Delta hpf$  containing mutant *hpf* alleles over the course of starvation. *P. aeruginosa*  $\Delta hpf$  containing *hpf* with random mutations show increased colony heterogeneity over the course of starvation, whereas alanine substitutions in equivalent positions restore wild-type colony morphologies.

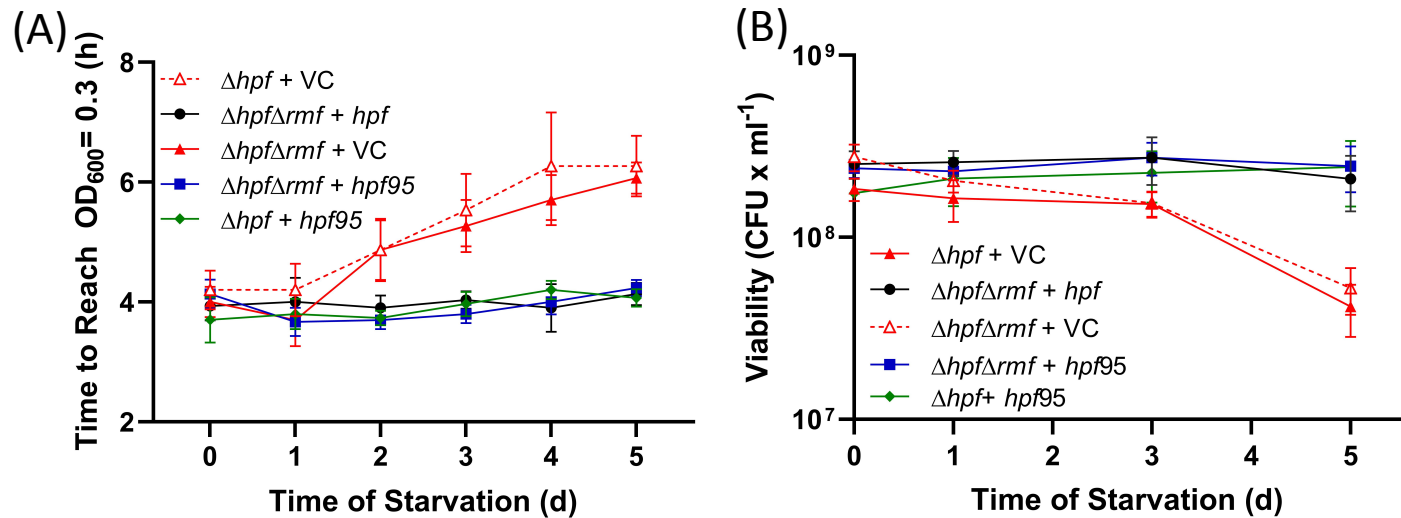

Figure S9. Resuscitation over the course of starvation for strains with C-terminal truncation of HPF. Strains were pre-cultured in the presence of 1 mM IPTG. (A) Resuscitation determined as time to reach O.D.=0.3 Red triangles show the  $\Delta hpf$  mutant with vector control (dashed lines) and the  $\Delta hpf\Delta rmf$  double mutant with vector control (solid lines). The  $hpf95$  truncated gene complemented both the  $\Delta hpf$  mutant (green diamonds) and the  $\Delta hpf\Delta rmf$  double mutant (blue squares). (B) Resuscitation of the  $\Delta hpf$  mutant, and the  $\Delta hpf\Delta rmf$  double mutant containing truncated  $hpf$ , quantified as CFUs, over the course of starvation. All data show the mean and standard error of the mean for three biological replicates.

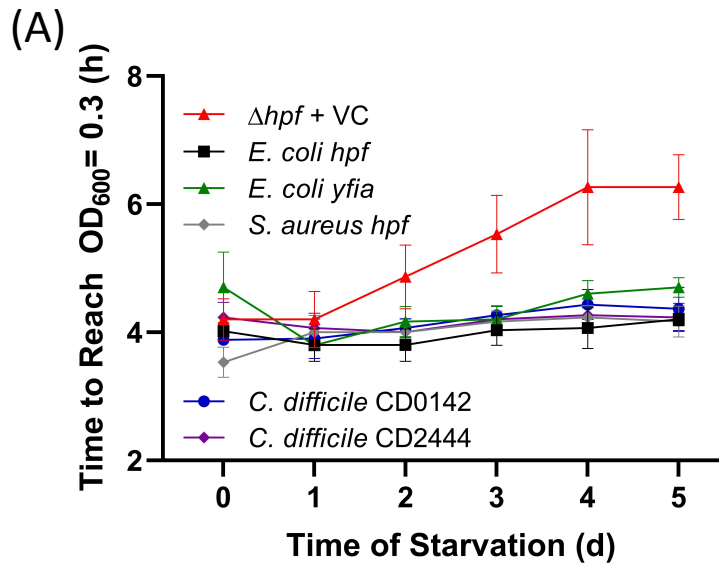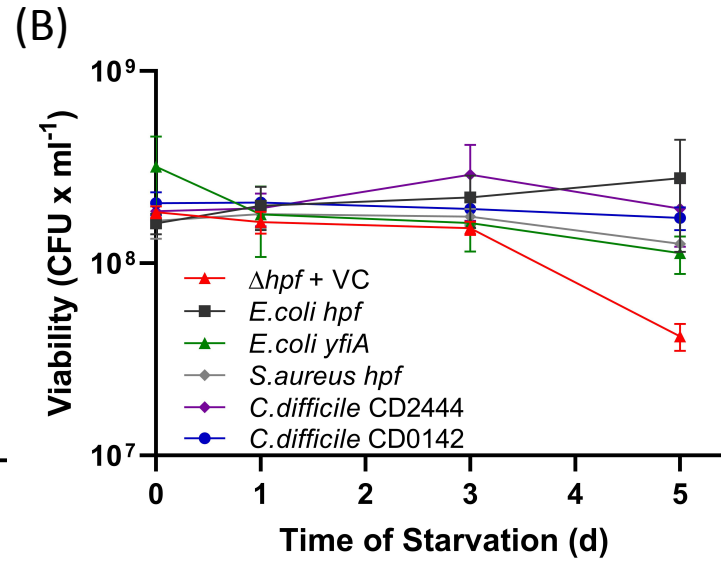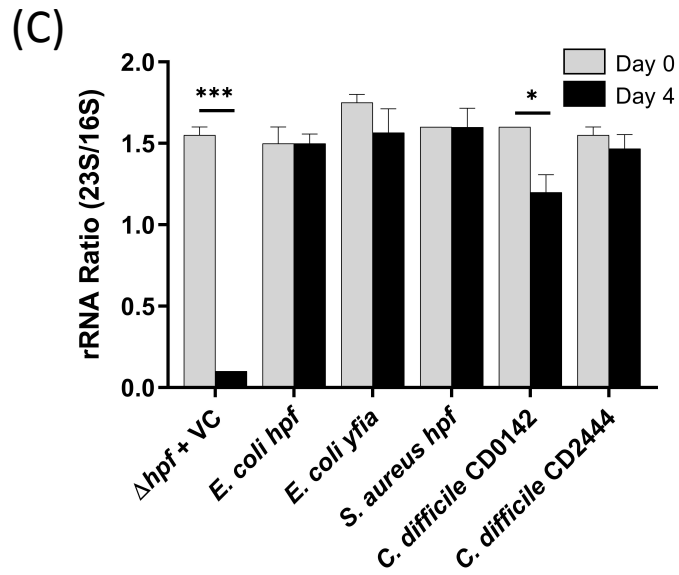

Figure S10. Resuscitation and ribosome protection of *P. aeruginosa*  $\Delta hpf$  containing heterologous *hpf* homologs, when strains were pre-cultured with 1 mM IPTG. (A) Time required to reach O.D.=0.3 following starvation for *P. aeruginosa*  $\Delta hpf$  containing *hpf* genes from *E. coli*, *S. aureus*, and *C. difficile*. (B) Regrowth of *P. aeruginosa*  $\Delta hpf$  containing heterologous *hpf* genes measured as CFUs following starvation. (C) Ratio of 23S/16S rRNA of *P. aeruginosa*  $\Delta hpf$  containing heterologous *hpf* homologs, before starvation (gray bars) and after four days of starvation (black bars). \*\*\*indicates a significant difference at  $p < 0.0001$ .

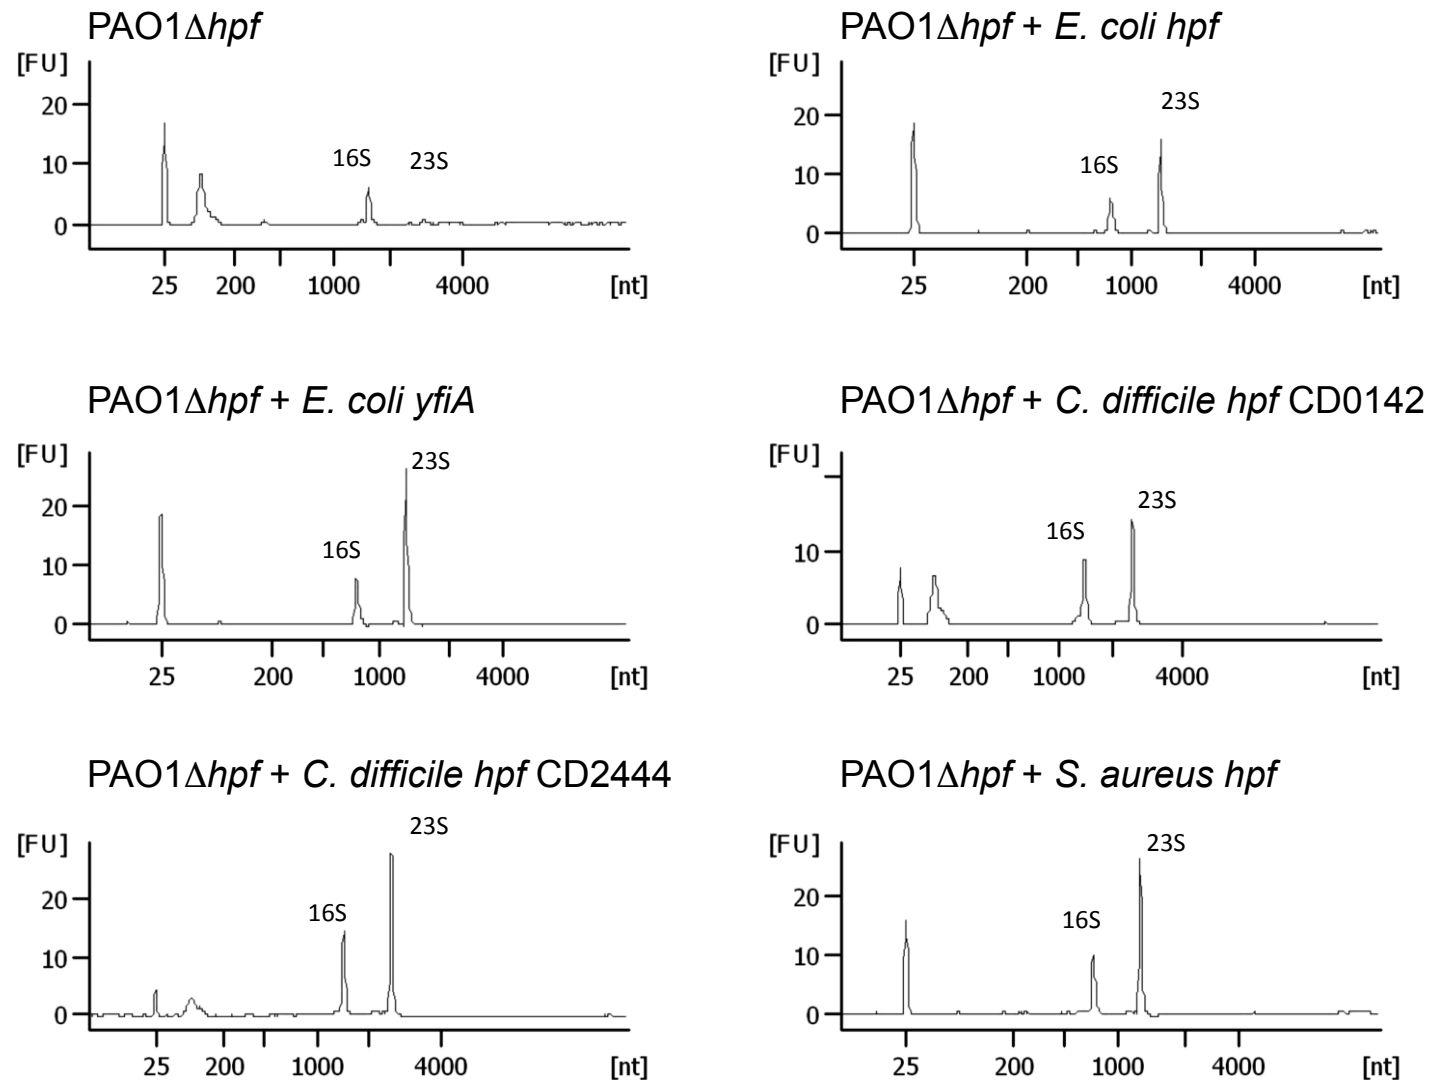

Figure S11. Representative Bioanalyzer traces showing 16S and 23S rRNA from *P. aeruginosa*  $\Delta hpf$  containing heterologous HPFs after 4 d of starvation. HPFs were expressed from plasmids under control of the  $P_{trc}$  promoter, induced with 1 mM IPTG. Following growth in TSB + IPTG, cells were starved for 4d in PBS. RNA was extracted from the starved cultures and run on an Agilent Bioanalyzer. The heterologous *hpf* genes included *hpf* and *yfiA* from *E. coli*, long HPFs from *C. difficile* CD0142 and CD2444, and long HPF from *S. aureus*. The results show that after starvation, the 23S rRNA is present in the *P. aeruginosa*  $\Delta hpf$  mutant complemented with all of the heterologous HPFs, but not in the vector control strain.

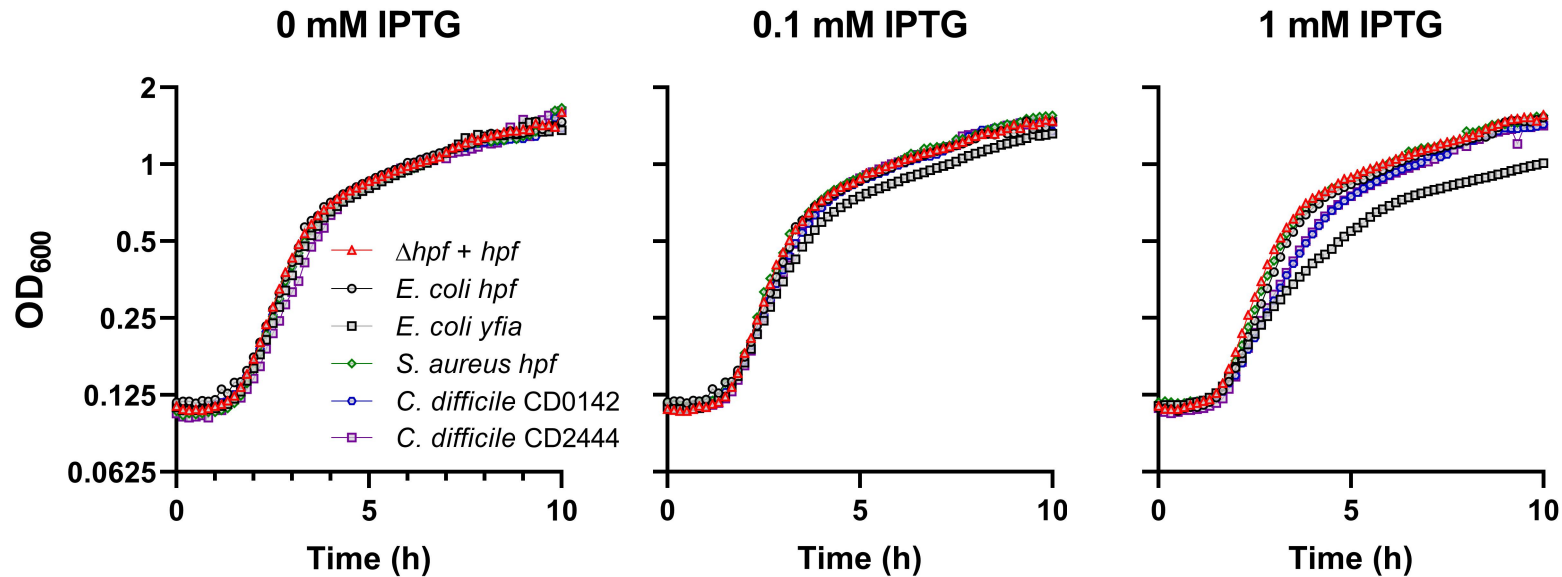

Fig S12. Growth curves of *P. aeruginosa*  $\Delta hpf$  complemented with heterologous *hpf* homologs, when no IPTG or 0.1 mM or 1 mM IPTG was added to the medium. When overexpressed with 1 mM IPTG, the *P. aeruginosa* HPF (red), *E. coli* HPF (gray circles), and *S. aureus* longHPF (green) did not affect growth. When overexpressed, *E. coli yfiA* (black squares) inhibited the growth rate of *P. aeruginosa*  $\Delta hpf$ . The *C. difficile* long-*hpf* 0142 (blue) and *C. difficile* long-*hpf* CD2444 (purple) had a minor influence on cell growth when overexpressed.

## Literature cited for supplementary tables and figures

- 1. Stover CK, Pham XQ, Erwin AL, Mizoguchi SD, Warren P, Hickey MJ, Brinkman FS, Hufnagle WO, Kowalik DJ, Lagrou M, Garber RL, Goltry L, Tolentino E, Westbrook-Wadman S, Yuan Y, Brody LL, Coulter SN, Folger KR, Kas A, Larbig K, Lim R, Smith K, Spencer D, Wong GK, Wu Z, Paulsen IT, Reizer J, Saier MH, Hancock RE, Lory S, Olson MV.** 2000. Complete genome sequence of *Pseudomonas aeruginosa* PA01, an opportunistic pathogen. *Nature* **406**:959-964.
- 2. Williamson KS, Richards LA, Perez-Osorio AC, Pitts B, McInnerney K, Stewart PS, Franklin MJ.** 2012. Heterogeneity in *Pseudomonas aeruginosa* biofilms includes expression of ribosome hibernation factors in the antibiotic-tolerant subpopulation and hypoxia-induced stress response in the metabolically active population. *J Bacteriol* **194**:2062-2073.
- 3. Franklin MJ, Chitnis CE, Gacesa P, Sonesson A, White DC, Ohman DE.** 1994. *Pseudomonas aeruginosa* AlgG is a polymer level alginate C5-mannuronan epimerase. *J. Bacteriol.* **176**:1821-1830.
- 4. Polikanov YS, Blaha GM, Steitz TA.** 2012. How hibernation factors RMF, HPF, and YfiA turn off protein synthesis. *Science* **336**:915-918.
- 5. De Bari H, Berry EA.** 2013. Structure of *Vibrio cholerae* ribosome hibernation promoting factor. *Acta Crystallogr Sect F Struct Biol Cryst Commun* **69**:228-236.
- 6. Beckert B, Abdelshahid M, Schafer H, Steinchen W, Arenz S, Berninghausen O, Beckmann R, Bange G, Turgay K, Wilson DN.** 2017. Structure of the *Bacillus subtilis* hibernating 100S ribosome reveals the basis for 70S dimerization. *EMBO Journal* **36**:2061-2072.
- 7. Khusainov I, Vicens Q, Ayupov R, Usachev K, Myasnikov A, Simonetti A, Validov S, Kieffer B, Yusupova G, Yusupov M, Hashem Y.** 2017. Structures and dynamics of hibernating ribosomes from *Staphylococcus aureus* mediated by intermolecular interactions of HPF. *EMBO Journal* **36**:2073-2087.
